# Supplementary material for: Mechanistic insights into dual active sites in Au@W18O49 electrocatalysts for the hydrogen evolution reaction
Source: Royal Society of Chemistry journal article supplement (doi:10.1039/d2qi00993e), 2022-01-01
Supplement: d2qi00993e1.pdf [file d2qi00993e1.pdf]

## Supporting Information

### Mechanistic insights into dual active sites in Au@W<sub>18</sub>O<sub>49</sub> electrocatalysts for hydrogen evolution reaction

Yaqin Yu<sup>a, b</sup>, Zhen Zhou<sup>c</sup>, Xiaoping Song<sup>a</sup>, Xiaowei Song<sup>a</sup>, Zhengdong Zhang<sup>a, \*</sup>,

Chuanyong Jing<sup>b, \*</sup>

<sup>a</sup> Center for Environmental Metrology, National Institute of Metrology, Beijing 100085, China.

<sup>b</sup> State Key Laboratory of Environmental Chemistry and Ecotoxicology, Research Center for Eco-Environmental Sciences, Chinese Academy of Sciences, Beijing 100085, China

<sup>c</sup> State Key Laboratory of Technologies in Space Cryogenic Propellants, Beijing Special Engineering Design and Research Institute, Beijing 100028, China

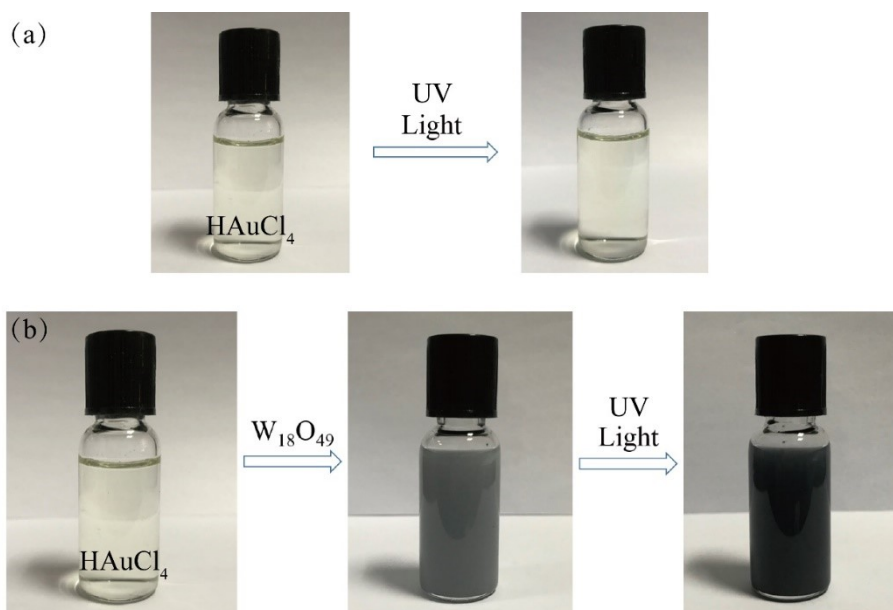

**Figure S1** Pictures of (a) HAuCl<sub>4</sub> solution under UV irradiation and (b) mixed solution of HAuCl<sub>4</sub> and W<sub>18</sub>O<sub>49</sub> under UV irradiation.

### SERS measurement

A mixture containing  $10^{-5}$  M R6G and  $0.1 \text{ g}\cdot\text{L}^{-1}$  Au@W<sub>18</sub>O<sub>49</sub> was dropped on silicon wafers and detected by the state translation nanoparticle-enhanced Raman spectroscopy (STNERS) method. Raman spectra were collected on a laser confocal microscopy Raman spectrometer (LabRAM HR Evolution, HORIBA, JPN) with an excitation wavelength of 785 nm. The spectra were acquired for 10 s with three accumulations.

Fig. S2a shows the Raman spectra of R6G ( $10^{-5}$  M) on the surface of Au@W<sub>18</sub>O<sub>49</sub> synthesized at different UV irradiation times. A significant Raman enhancement was observed by extending the UV irradiation time. Four characteristic bands of R6G centered at 612, 773, 1360, and 1650  $\text{cm}^{-1}$ , named P1, P2, P3, and P4, were detected, suggesting that Au@W<sub>18</sub>O<sub>49</sub> could work as SERS substrates. The Raman intensity of R6G as a function of UV irradiation time (Fig. S2b) suggests that the adsorbed AuCl<sub>2</sub> molecules were reduced to Au NPs at twelve minutes. With the irradiation time extending to about 18 minutes, the size and gaps of Au nanoparticles were optimal.

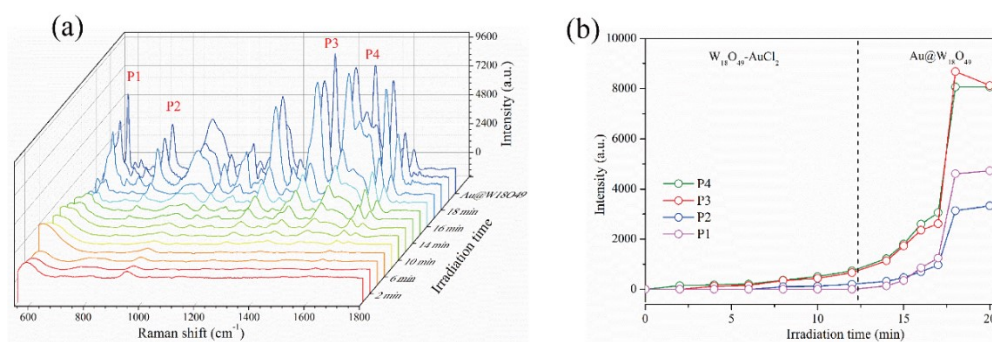

**Figure S2** (a) Surface-enhanced Raman spectra of R6G with Au@W<sub>18</sub>O<sub>49</sub> as substrates, and (b) intensity of R6G Raman peaks with extending UV irradiation time.

### Characterization of Au@W<sub>18</sub>O<sub>49</sub> catalysts

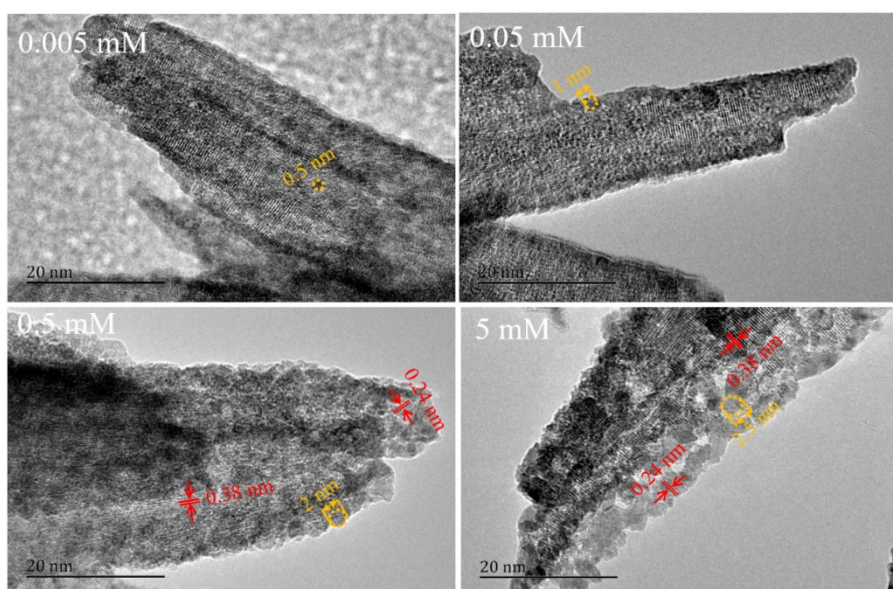

**Figure S3** HR-TEM images of Au@W<sub>18</sub>O<sub>49</sub> synthesized with 0.005, 0.05, 0.5, and 5 mM HAuCl<sub>4</sub> solution.

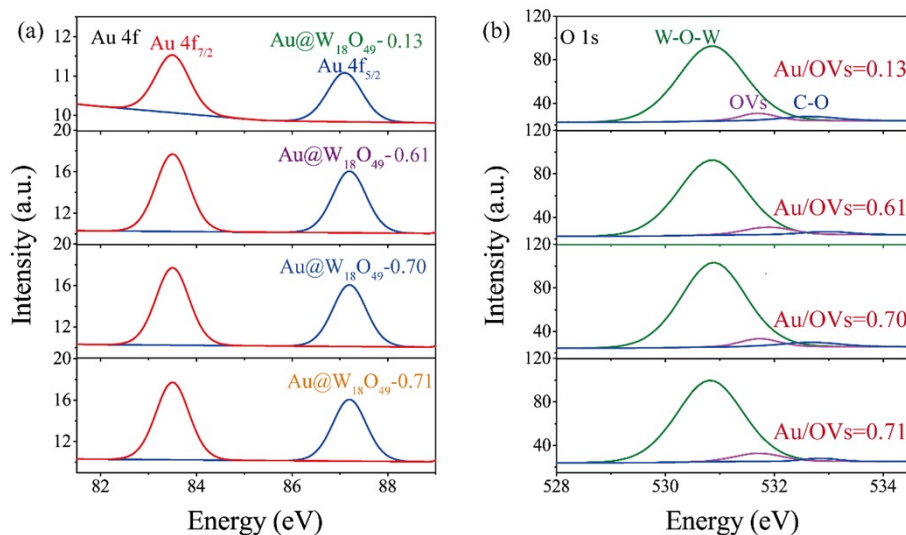

**Figure S4** XPS Au4f spectra (a) and O1s spectra (b) of Au@W<sub>18</sub>O<sub>49</sub>-0.13, Au@W<sub>18</sub>O<sub>49</sub>-0.61, Au@W<sub>18</sub>O<sub>49</sub>-0.70, and Au@W<sub>18</sub>O<sub>49</sub>-0.71.

The Brunauer–Emmett–Teller (BET) specific surface area was determined from the N<sub>2</sub> adsorption-desorption isotherms obtained using an automated gas sorption instrument (Quantachrome Instruments, US).

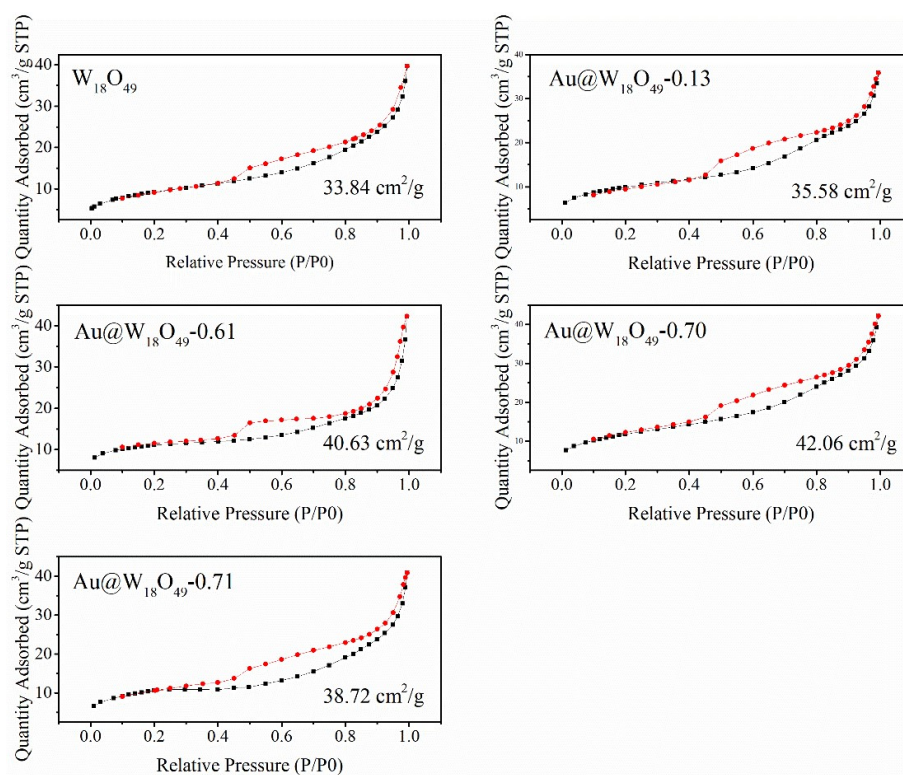

**Figure S5** N<sub>2</sub> adsorption-desorption isotherms of W<sub>18</sub>O<sub>49</sub>, Au@W<sub>18</sub>O<sub>49</sub>-0.13, Au@W<sub>18</sub>O<sub>49</sub>-0.61, Au@W<sub>18</sub>O<sub>49</sub>-0.70, Au@W<sub>18</sub>O<sub>49</sub>-0.71.

### ***Electrochemical Behavior of Au@W<sub>18</sub>O<sub>49</sub>***

The catalytic performance of the prepared samples for hydrogen evolution reaction was measured with a three-electrode cell by linear sweep voltammetry on an Autolab electrochemical analyzer (PGSTAT302N, Switzerland). A commercial glassy carbon electrode (GCE) served as the working electrode, graphite rod electrode as the counter electrode, and Ag/AgCl (CH Instruments, Shanghai, China) as the reference electrode. The commercial GCE (~0.07 cm<sup>2</sup> area, 3 mm diameter) was polished with alumina powder, ultrasonically washed, and blow-dried. About 5 mg of the measured materials were dispersed in the mixture solution of 0.2 mL 5 wt% Nafion solution and 1.8 mL ethanol by ultrasonication for 30 min to obtain a homogeneous solution. Then, 5  $\mu$ L of the as-prepared ink was dropped on the polished GCE (mass loading  $\approx$  0.17 mg cm<sup>-2</sup>). The electrolyte (0.5 M H<sub>2</sub>SO<sub>4</sub>) was purged with H<sub>2</sub> gas for at least 30 min to reach the H<sub>2</sub>O/H<sub>2</sub> equilibrium.

HER polarization curve was recorded between 0.1 and -0.8 V versus the reversible hydrogen electrode (RHE) at the scan rate of 5 mV·s<sup>-1</sup>. The polarization curves were measured with an ohmic potential drop (iR) correction. Tafel plots of the linear region were obtained using the following Tafel equation:  $\eta = a + b \times \log j$ , where  $\eta$  represents overpotential,  $b$  is the Tafel slope, and  $j$  represents the current density. For iR compensation, the potential was corrected according to the equation:  $E_{\text{com}} = E_{\text{mea}} - iR_u$ , where  $E_{\text{com}}$  is the compensated potential,  $E_{\text{mea}}$  is the measured potential,  $i$  is the current, and  $R_u$  stands for the series resistance based on electrochemical impedance spectroscopy (EIS) measurements. EIS was conducted under a potential of -0.160 V (vs RHE) in the frequency range of 100 kHz to 0.1 Hz with 5 mV amplitude. The Faradic efficiency of HER catalysts is defined as the ratio of the amount of experimentally determined H<sub>2</sub> to that of the theoretically expected H<sub>2</sub> from the reaction. and S10). The amount of H<sub>2</sub> evolved during HER was determined quantitatively by gas chromatography (GC-2030ATF, SHIMADZU). The theoretical amount of H<sub>2</sub> can be calculated using the following formula:  $M = (I \times t) / (n \times F)$ , where  $I$  represents the current (mA),  $t$  is the electrolysis time (s),  $n$  indicates the number of electrons

transferred ( $n= 2$  for the HER),  $F$  is the Faraday constant ( $96,485\text{C mol}^{-1}$ ).

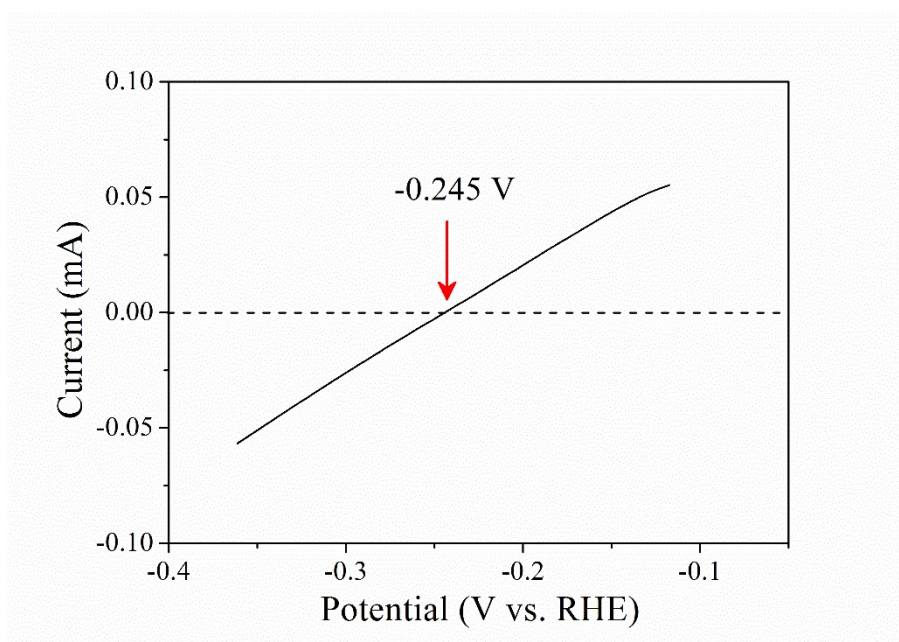

**Figure S6** Current-potential curve for the calibration of Ag/AgCl electrode with respect to RHE in 0.5 M  $\text{H}_2\text{SO}_4$  with a glassy carbon electrode as the working electrode.

As shown in Fig. S7, the peak current increased linearly with the scan rate increasing from 20 to 100  $\text{mV}\cdot\text{s}^{-1}$ . The CV spectra conform to the Randles-Sevcik equation,  $i_p = (2.69 \times 10^5)n^{3/2}ACD^{1/2}\nu^{1/2}$ . In the equation,  $i_p$ =maximum current,  $n$ =number of electrons,  $A$ =electrode area,  $C$ = $\text{K}_3[\text{Fe}(\text{CN})_6]$  concentration,  $D$ =diffusion coefficient,  $\nu$ =scan rate.



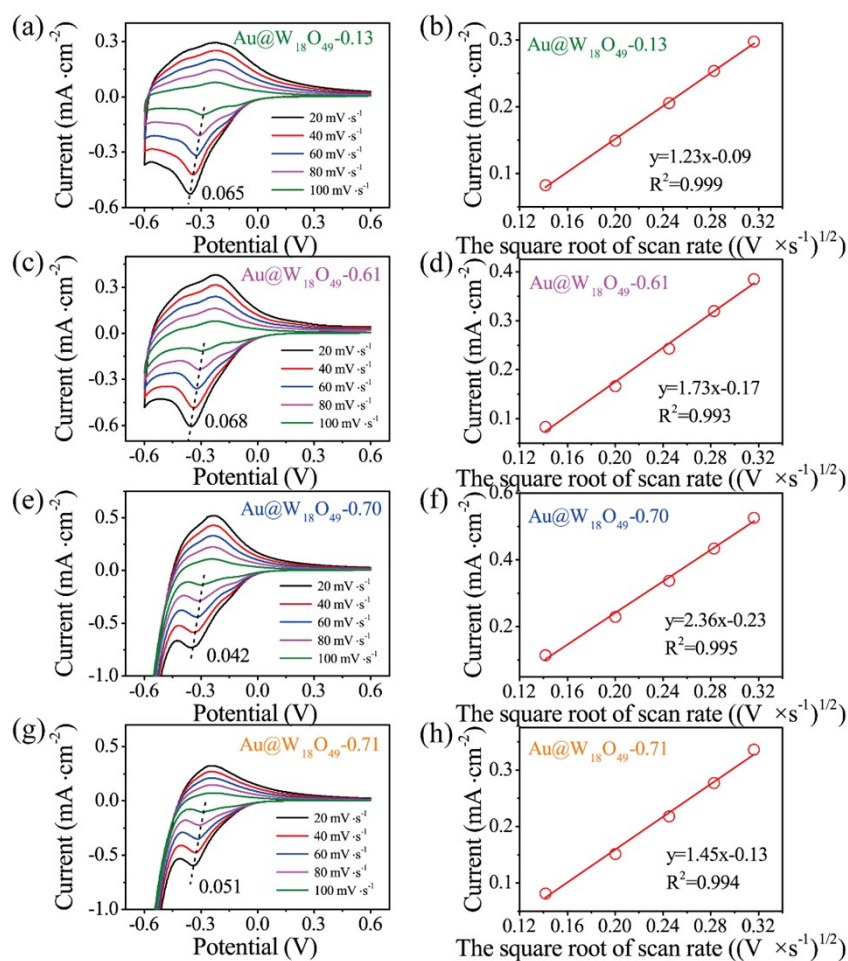

**Figure S7** Cycle voltammogram for (a) Au@W<sub>18</sub>O<sub>49</sub>-0.13, (c) Au@W<sub>18</sub>O<sub>49</sub>-0.61, (e) Au@W<sub>18</sub>O<sub>49</sub>-0.70, and (g) Au@W<sub>18</sub>O<sub>49</sub>-0.71 with scan rate increasing from 20 to 100 mV·s<sup>-1</sup>. (b), (d), (f), and (h) The corresponding linear relationship between current versus the square root of scan rate.

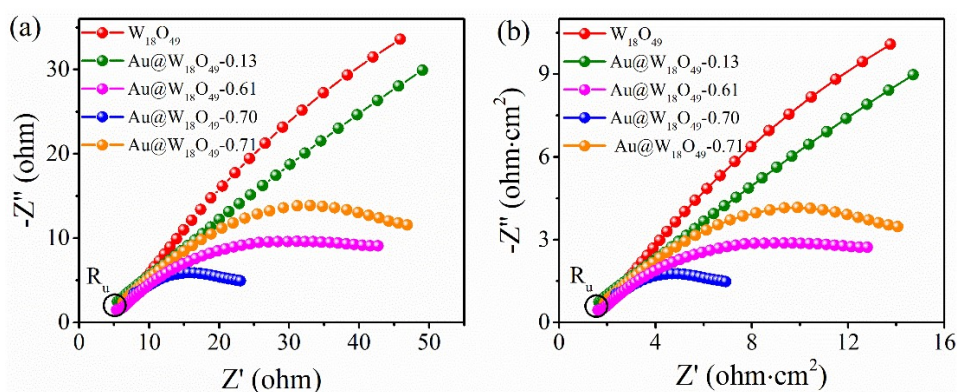

**Figure S8** Nyquist plot of Au@W<sub>18</sub>O<sub>49</sub> acquired in 0.5 M H<sub>2</sub>SO<sub>4</sub> from 100 kHz to 0.1 Hz without (a) and with (b) geometrical area normalization.

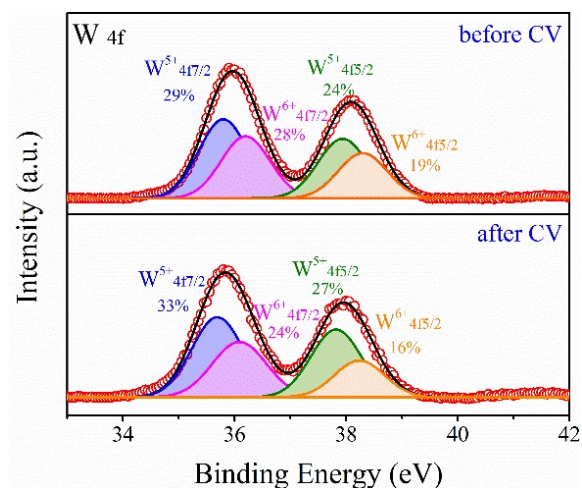

**Figure S9** XPS W 4f spectra of Au@W<sub>18</sub>O<sub>49</sub>-0.70 before and after long-term potential cycling.

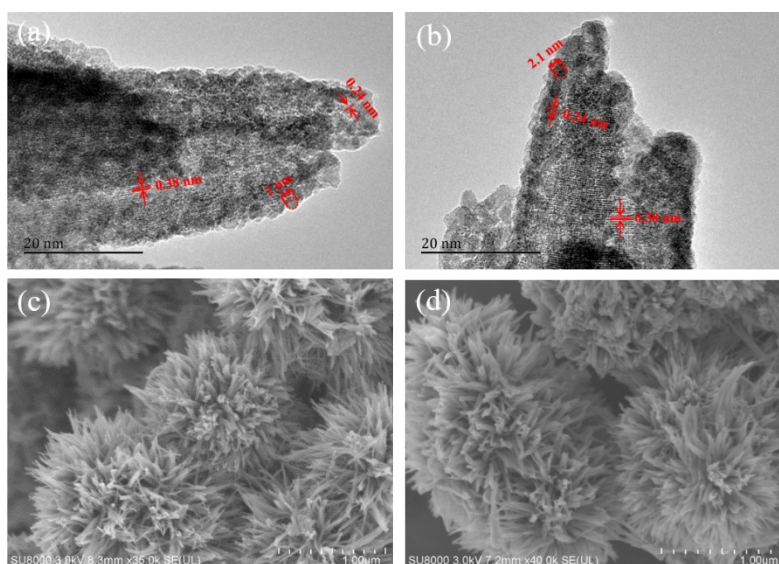

**Figure S10** HR-TEM images of Au@W<sub>18</sub>O<sub>49</sub>-0.70 (a) before and (b) after long-term potential cycling. SEM images of Au@W<sub>18</sub>O<sub>49</sub>-0.70 (c) before and (d) after long-term potential cycling.



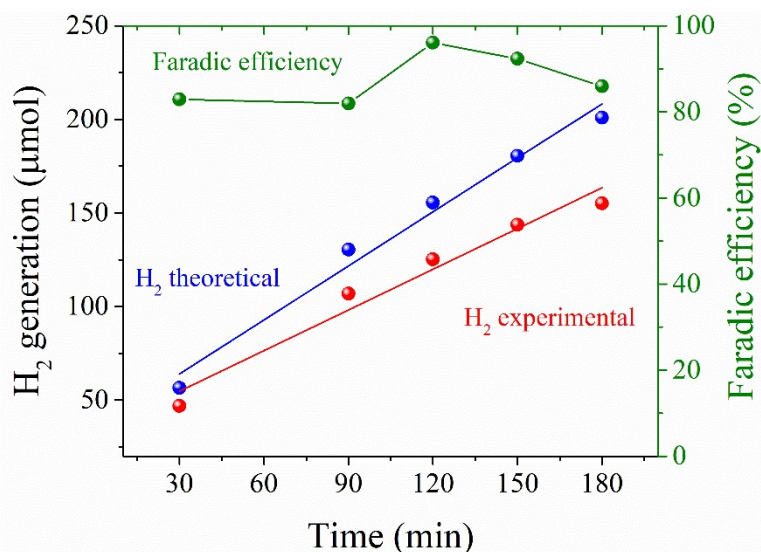

**Figure S11** Amount of H<sub>2</sub> theoretically calculated and experimentally measured as a function of time. The Faradic efficiency of Au@W<sub>18</sub>O<sub>49</sub>-0.70 catalysts in 0.5 M H<sub>2</sub>SO<sub>4</sub>.

**Table S1.** Comparison of  $\eta_{10}$  and Tafel slope for the HER of Au@W<sub>18</sub>O<sub>49</sub> catalysts.

| Sample                                   | $\eta_{10}$ (mV) | Tafel slope (mV·dec <sup>-1</sup> ) |
|------------------------------------------|------------------|-------------------------------------|
| W <sub>18</sub> O <sub>49</sub>          | 507±18.9         | 163±16.2                            |
| Au@W <sub>18</sub> O <sub>49</sub> -0.13 | 492±19.1         | 153±10.2                            |
| Au@W <sub>18</sub> O <sub>49</sub> -0.61 | 94±25.2          | 76±3.7                              |
| Au@W <sub>18</sub> O <sub>49</sub> -0.70 | 79±18.1          | 58±3.0                              |
| Au@W <sub>18</sub> O <sub>49</sub> -0.71 | 302±37.8         | 92±1.5                              |

**Table S2.** Comparison of  $\eta_{10}$  and Tafel slope for the HER of prepared and reported WO<sub>x</sub>-based catalysts.

| Electrodes                  | $\eta_{10}$ (mV) | Tafel slope (mV·dec <sup>-1</sup> ) | C <sub>dl</sub> (mF·cm <sup>-2</sup> ) | Ref. |
|-----------------------------|------------------|-------------------------------------|----------------------------------------|------|
| WO <sub>3</sub> spheres     | 520              | 139                                 | -                                      | 1    |
| WO <sub>x</sub> -PtNi@Pt    | 22               | -                                   | -                                      | 2    |
| DNWs                        |                  |                                     |                                        |      |
| Pt NP/WO <sub>3-x</sub>     | 38               | -                                   | -                                      | 3    |
| Pt/def-WO <sub>3</sub> @CFC | 42               | 61                                  | 36.3                                   | 4    |
| Meso-WO <sub>3</sub>        | 598              | 134                                 | -                                      | 5    |

|                                             |           |           |            |    |
|---------------------------------------------|-----------|-----------|------------|----|
| Meso-WO <sub>2.83</sub>                     | 287       | 95        | -          | 5  |
| Pt-WO <sub>x</sub> /WS <sub>2</sub>         | 42        | 26        | 4.16       | 6  |
| WO <sub>x</sub> /C-4                        | 202.60    | 198.26    | -          | 7  |
| WO <sub>3</sub> nanorods                    | 152       | 96        | 1.05       | 8  |
| WS <sub>2</sub> /WO <sub>3</sub>            | 395       | 50        | -          | 9  |
| Ni <sub>2</sub> P-WO <sub>3</sub> -60       | 105       | 92        | 0.23       | 10 |
| m-WO <sub>3</sub> /rGO                      | 35        | 32        | -          | 11 |
| h-WO <sub>3</sub> /rGO                      | 69        | 37        | -          | 11 |
| Monoclinic-WO <sub>3</sub>                  | 106       | 78        | 0.062      | 12 |
| Hexagonal-WO <sub>3</sub>                   | 83        | 48        | 0.152      | 12 |
| WO <sub>3-x</sub> -30-CNFs                  | 185       | 89        | 711        | 13 |
| Mo-W <sub>18</sub> O <sub>49</sub>          | 45        | 54        | 5.9        | 14 |
| Pd-W <sub>18</sub> O <sub>49</sub>          | 137       | 54        | -          | 15 |
| WO <sub>2</sub> -MWCMN                      | 58        | 46        | -          | 16 |
| Pt/C                                        | 34        | 46        | -          |    |
| <b>Au@W<sub>18</sub>O<sub>49</sub>-0.70</b> | <b>79</b> | <b>58</b> | <b>3.9</b> |    |

**Table S3.** Comparison of  $\eta_{10}$  and Tafel slope for the HER of prepared and reported Au-based catalysts.

| Electrodes                                   | $\eta_{10}$<br>(mV) | Tafel slope<br>(mV·dec <sup>-1</sup> ) | C <sub>dl</sub> (mF·cm <sup>-2</sup> ) | Ref. |
|----------------------------------------------|---------------------|----------------------------------------|----------------------------------------|------|
| Au/Co <sub>3</sub> O <sub>4</sub>            | 168                 | 79                                     | -                                      | 17   |
| Au/Ni <sub>3</sub> S <sub>2</sub>            | 97                  | 51                                     | 18.5                                   | 18   |
| Au@Co <sub>2</sub> N <sub>0.67</sub> /3D-NGr | 91.4                | 52.3                                   | 24.1                                   | 19   |
| Au/MoS <sub>2</sub>                          | 77                  | 92                                     | 11.1                                   | 20   |
| MoS <sub>2</sub> /Au <sup>0</sup> /N-CNT     | 318                 | 128                                    | 37                                     | 21   |
| Au-MoS <sub>2</sub> /CNFs                    | 92                  | 126                                    | 14.4                                   | 22   |
| 3DG-Au-Ni <sub>3</sub> S <sub>2</sub> -15c   | 140                 | 93                                     | 37.98                                  | 23   |
| Au/rGO                                       | 176                 | 88                                     | -                                      | 24   |

|                                              |           |           |            |    |
|----------------------------------------------|-----------|-----------|------------|----|
| S-Au@MoS <sub>2</sub>                        | 164       | 50        | -          | 25 |
| Au-MoS <sub>2</sub>                          | 120       | 163       | -          | 26 |
| MoS <sub>2</sub> -Au                         | 66        | 40        | -          | 27 |
| Au@NC                                        | 130       | 76.8      | 18.65      | 28 |
| Au/rGO                                       | 260       | 39.2      | -          | 29 |
| C/Ni-AuPt                                    | 131       | 66        | 0.828      | 30 |
| AuRu alloy NFs                               | 43        | 35.7      | -          | 31 |
| Au NDs                                       | 67        | 65        | -          | 32 |
| Au/Co <sub>9</sub> S <sub>8</sub>            | 35        | 64        | 9.8        | 33 |
| Au-SnO <sub>x</sub>                          | 148       | 79        | 0.017      | 34 |
| TiO <sub>2</sub> NPs@TiO <sub>2</sub> NSs@Au | 440       | 58        | 0.026      | 35 |
| NPs                                          |           |           |            |    |
| Au/Cu-NPZ-CPE                                | 100       | 33        | 12.9       | 36 |
| Au-Cu/CNFs                                   | 83        | 70        | 483        | 37 |
| Pt-Au NPs/CNFs                               | 235       | 84        | -          | 38 |
| AuNPs@NCNRs/CNFs                             | 126       | 93        | -          | 39 |
| <b>Au@W<sub>18</sub>O<sub>49</sub>-0.70</b>  | <b>79</b> | <b>58</b> | <b>3.9</b> |    |

## References

1. M. M. Mohamed, T. M. Salama, M. A. Hegazy, R. M. Abou Shahba and S. H. Mohamed, Synthesis of hexagonal WO<sub>3</sub> nanocrystals with various morphologies and their enhanced electrocatalytic activities toward hydrogen evolution, *Int. J. Hydrogen Energy*, 2019, **44**, 4724-4736.
2. W. Zhang, B. Huang, K. Wang, W. Yang, F. Lv, N. Li, Y. Chao, P. Zhou, Y. Yang, Y. Li, J. Zhou, W. Zhang, Y. Du, D. Su and S. Guo, WO<sub>x</sub>-surface decorated PtNi@Pt dendritic nanowires as efficient pH-universal hydrogen evolution electrocatalysts, *Adv. Energy Mater.*, 2021, **11**.
3. J. Park, S. Lee, H. Kim, A. Cho, S. Kim, Y. Ye, J. W. Han, H. Lee, J. H. Jang and J. Lee, Investigation of the support effect in atomically dispersed Pt on WO<sub>3-x</sub> for utilization of Pt in the hydrogen evolution reaction, *Angew. Chem. Int. Ed.*, 2019, **58**, 16038-16042.
4. H. Tian, X. Z. Cui, L. M. Zeng, L. Su, Y. L. Song and J. L. Shi, Oxygen vacancy-assisted hydrogen evolution reaction of the Pt/WO<sub>3</sub> electrocatalyst, *J. Mater. Chem. A*, 2019, **7**, 6285-6293.
5. H. Cheng, M. Klapproth, A. Sagaltchik, S. Li and A. Thomas, Ordered mesoporous WO<sub>2.83</sub>:

- selective reduction synthesis, exceptional localized surface plasmon resonance and enhanced hydrogen evolution reaction activity, *J. Mater. Chem. A*, 2018, **6**, 2249-2256.
6. L. S. Oh, J. Y. Kim, H. W. Kim, J. Han, E. Lim, W. B. Kim, J. H. Park and H. J. Kim, Unveiling the enhanced electrocatalytic activity at electrochemically synthesized Pt-WO<sub>x</sub> hybrid nanostructure interfaces, *Chem. Commun.*, 2021, **57**, 11165-11168.
  7. J. Lu, G. Qian, L. Luo, H. He and S. Yin, Contributions of oxygen vacancies to the hydrogen evolution catalytic activity of tungsten oxides, *Int. J. Hydrogen Energy*, 2021, **46**, 676-682.
  8. R. Rajalakshmi, A. Rebekah, C. Viswanathan and N. Ponpandian, Evolution of intrinsic 1-3D WO<sub>3</sub> nanostructures: Tailoring their phase structure and morphology for robust hydrogen evolution reaction, *Chem. Eng. J.*, 2022, **428**.
  9. X. Shang, Y. Rao, S. Lu, B. Dong, L. Zhang, X. Liu, X. Li, Y. Liu, Y. Chai and C. Liu, Novel WS<sub>2</sub>/WO<sub>3</sub> heterostructured nanosheets as efficient electrocatalyst for hydrogen evolution reaction, *Mater. Chem. Phys.*, 2017, **197**, 123-128.
  10. B. Wang, L. Wang, Y. Qian, Y. Yang, T. T. Isimjan and X. Yang, Construction of a self-supporting Ni<sub>2</sub>P-WO<sub>3</sub> heterostructure for highly efficient hydrogen evolution under both caustic and acidic conditions, *Sustain. Energy Fuels*, 2021, **5**, 2884-2892.
  11. J. Yang, X. Chen, X. Liu, Y. Cao, J. Huang, Y. Li and F. Liu, From hexagonal to monoclinic: engineering crystalline phase to boost the intrinsic catalytic activity of tungsten oxides for the hydrogen evolution reaction, *ACS Sustain. Chem. Eng.*, 2021, **9**, 5642-5650.
  12. X. Zhang, G. Jin, D. Wang, Z. Chen, M. Zhao and G. Xi, Crystallographic phase and morphology dependent hydrothermal synthesis of tungsten oxide for robust hydrogen evolution reaction, *J. Alloys Compd.*, 2021, **875**.
  13. J. D. Chen, D. N. Yu, W. S. Liao, M. D. Zheng, L. F. Xiao, H. Zhu, M. Zhang, M. L. Du and J. M. Yao, WO<sub>3-x</sub> nanoplates grown on carbon nanofibers for an efficient electrocatalytic hydrogen evolution reaction, *ACS Appl. Mater. Interfaces*, 2016, **8**, 18132-18139.
  14. X. Zhong, Y. Sun, X. Chen, G. Zhuang, X. Li and J. Wang, Mo doping induced more active sites in urchin-like W<sub>18</sub>O<sub>49</sub> nanostructure with remarkably enhanced performance for hydrogen evolution reaction, *Adv. Funct. Mater.*, 2016, **26**, 5778-5786.
  15. Y. Y. Zhao, Q. W. Tang, P. Z. Yang and B. L. He, Robust electrocatalysts from metal doped W<sub>18</sub>O<sub>49</sub> nanofibers for hydrogen evolution, *Chem. Commun.*, 2017, **53**, 4323-4326.
  16. R. Wu, J. F. Zhang, Y. M. Shi, D. Liu and B. Zhang, Metallic WO<sub>2</sub>-carbon mesoporous nanowires as highly efficient electrocatalysts for hydrogen evolution reaction, *J. Am. Chem. Soc.*, 2015, **137**, 6983-6986.
  17. X. L. Zhong, J. Z. Huang, M. Wang and L. S. Wang, Polythionine coated on Au/Co<sub>3</sub>O<sub>4</sub> enhances the performance for hydrogen evolution reaction, *NANO*, 2021, **16**.
  18. H. Liu, J. N. Cheng, W. J. He, Y. Li, J. Mao, X. R. Zheng, C. Chen, C. X. Cui and Q. Y. Hao, Interfacial electronic modulation of Ni<sub>3</sub>S<sub>2</sub> nanosheet arrays decorated with Au nanoparticles boosts overall water splitting, *Appl. Catal. B-Environ.* 2022, **304**.
  19. D. C. Nguyen, T. L. L. Doan, S. Prabhakaran, D. H. Kim, N. H. Kim and J. H. Lee, Rational construction of Au@Co<sub>2</sub>N<sub>0.67</sub> nanodots-interspersed 3D interconnected N-graphene hollow sphere network for efficient water splitting and Zn-air battery, *Nano Energy*, 2021, **89**.
  20. Y. T. Jing, R. J. Wang, Q. Wang and X. F. Wang, Gold nanoclusters grown on MoS<sub>2</sub> nanosheets by pulsed laser deposition: An enhanced hydrogen evolution reaction,

- Molecules*, 2021, **26**.
21. Y. Yang, H. Wang, W. J. Qin, Y. X. Guo, H. Q. Yao, J. Li, K. R. Shi and S. L. Ma, MoS<sub>2</sub>/Au<sup>0</sup>/N-CNT derived from Au(III) extraction by polypyrrole/MoS<sub>4</sub> as an electrocatalyst for hydrogen evolution reaction, *J. Colloid Interface Sci.*, 2020, **561**, 298-306.
  22. Y. K. Wen, H. Zhu, L. L. Zhang, S. G. Zhang, M. Zhang and M. L. Du, Activating MoS<sub>2</sub> by interface engineering for efficient hydrogen evolution catalysis, *Mater. Res. Bull.*, 2019, **112**, 46-52.
  23. H. C. Tsai, B. Vedhanarayanan and T. W. Lin, Freestanding and hierarchically structured au-dendrites/3D-graphene scaffold supports highly active and stable Ni<sub>3</sub>S<sub>2</sub> electrocatalyst toward overall water splitting, *Acs Appl. Energy Mater.* 2019, **2**, 3708-3716.
  24. E. Topcu and K. D. Kiransan, Flexible gold nanoparticles/rGO and thin film/rGO papers: novel electrocatalysts for hydrogen evolution reaction, *J. Chem. Technol. Biotechnol.*, 2019, **94**, 3895-3904.
  25. R. Bar-Ziv, P. Ranjan, A. Lavie, A. Jain, S. Garai, A. Bar Hen, R. Popoyitz-Biro, R. Tenne, R. Arenal, A. Ramasubramaniam, L. Lajaunie and M. Bar-Sadan, Au-MoS<sub>2</sub> hybrids as hydrogen evolution electrocatalysts, *Acs Appl. Energy Mater.* 2019, **2**, 6043-6050.
  26. X. Zhao, D. W. He, Y. S. Wang and C. Fu, In situ growth of different numbers of gold nanoparticles on MoS<sub>2</sub> with enhanced electrocatalytic activity for hydrogen evolution reaction, *Chinese Phys. B*, 2018, **27**.
  27. J. X. Zhang, T. Y. Wang, L. Liu, K. Z. Du, W. L. Liu, Z. W. Zhu and M. X. Li, Molybdenum disulfide and Au ultrasmall nanohybrids as highly active electrocatalysts for hydrogen evolution reaction, *J. Mater. Chem. A*, 2017, **5**, 4122-4128.
  28. W. J. Zhou, T. L. Xiong, C. H. Shi, J. Zhou, K. Zhou, N. W. Zhu, L. G. Li, Z. H. Tang and S. W. Chen, Bioreduction of precious metals by microorganism: efficient gold@N-doped carbon electrocatalysts for the hydrogen evolution reaction, *Angew. Chem. Int. Ed.* 2016, **55**, 8416-8420.
  29. G. Darabdhara, M. A. Amin, G. A. M. Mersal, E. M. Ahmed, M. R. Das, M. B. Zakaria, V. Malgras, S. M. Alshehri, Y. Yamauchi, S. Szunerits and R. Boukherroub, Reduced graphene oxide nanosheets decorated with Au, Pd and Au-Pd bimetallic nanoparticles as highly efficient catalysts for electrochemical hydrogen generation, *J. Mater. Chem. A*, 2015, **3**, 20254-20266.
  30. Y. Yu, S. J. Lee, J. Theerthagiri, S. Fonseca, L. M. C. Pinto, G. Maia and M. Y. Choi, Reconciling of experimental and theoretical insights on the electroactive behavior of C/Ni nanoparticles with AuPt alloys for hydrogen evolution efficiency and Non-enzymatic sensor, *Chem. Eng. J.*, 2022, **435**.
  31. T. Kwon, A. Yu, S. J. Kim, M. H. Kim, C. Lee and Y. Lee, Au-Ru alloy nanofibers as a highly stable and active bifunctional electrocatalyst for acidic water splitting, *Appl. Surf. Sci.*, 2021, **563**.
  32. M. N. Hossain, S. Ahmad and H. B. Kraatz, Synthesis and electrochemical study of coinage metal nanodendrites for hydrogen evolution reaction, *Int. J. Hydrogen Energy*, 2021, **46**, 2007-2017.
  33. M. A. Ehsan, D. Khalafallah, M. J. Zhi and Z. L. Hong, Synthesis of Au/Co<sub>9</sub>S<sub>8</sub> composite aerogels by one-step sol-gel method as hydrogen evolution reaction electrocatalysts, *J.*



- Porous Mater.*, 2021, **28**, 99-108.
34. X. L. Lu, T. S. Yu, H. L. Wang, R. C. Luo, P. Liu, S. L. Yuan and L. H. Qian, Self-supported nanoporous gold with gradient tin oxide for sustainable and efficient hydrogen evolution in neutral media, *J. Renew. Mater.* 2020, **8**, 133-151.
  35. M. Y. Li, H. Liu, Y. H. Song and Z. Li, TiO<sub>2</sub> homojunction with Au nanoparticles decorating as an efficient and stable electrocatalyst for hydrogen evolution reaction, *Mater. Charact.*, 2019, **151**, 286-291.
  36. F. Amiripour, S. N. Azizi and S. Ghasemi, Nano P zeolite modified with Au/Cu bimetallic nanoparticles for enhanced hydrogen evolution reaction, *Int. J. Hydrogen Energy*, 2019, **a44**, 605-617.
  37. J. Wang, H. Zhu, D. N. Yu, J. W. Chen, J. D. Chen, M. Zhang, L. N. Wang and M. L. Du, Engineering the composition and structure of bimetallic Au-Cu alloy nanoparticles in carbon nanofibers: Self-supported electrode materials for electrocatalytic water splitting, *Acs Appl. Mater. Interfaces*, 2017, **9**, 19756-19765.
  38. B. Zhang, H. Zhu, M. L. Zou, X. R. Liu, H. Yang, M. Zhang, W. W. Wu, J. M. Yao and M. L. Du, Design and fabrication of size-controlled Pt-Au bimetallic alloy nanostructure in carbon nanofibers: a bifunctional material for biosensors and the hydrogen evolution reaction, *J. Mater. Sci.* 2017, **52**, 8207-8218.
  39. M. Zhang, S. S. Wang, T. Li, J. D. Chen, H. Zhu and M. L. Du, Nitrogen and gold nanoparticles co-doped carbon nanofiber hierarchical structures for efficient hydrogen evolution reactions, *Electrochim. Acta*, 2016, **208**, 1-9.
